# Supplementary material for: Development of Functional and Molecular Correlates of Vaccine-Induced Protection for a Model Intracellular Pathogen, F. tularensis LVS
Source: PLoS Pathog. 2012 Jan 19;8(1):e1002494. doi: 10.1371/journal.ppat.1002494 (PMC3262015; doi:10.1371/journal.ppat.1002494)
Supplement: Table S2 — Relative gene expression in splenocytes derived from differentially vaccinated mice. * In each experiment, 5 mice per vaccine group as well as 5 naive mice were challenged with 5×105 - 106 CFU LVS IP (determined by retrospective plate count), and survival monitored for a month; all naive mice died within 6 days of challenge, and the numbers of surviving mice within each vaccine group are shown. ‡ Gene expression was evaluated by RT PCR using TH1-TH2-TH3 panel (“Profiler”); selected genes were further evaluated using specific primer/probe sets (“qRT-PCR”). ∼All values are calculated fold differences of gene expression between vaccinated and non-vaccinated (naive) splenocytes. % In experiment 2, the same mRNA preparation was subjected to two independent PCR reactions (2a and 2b). # Mice vaccinated in experiments 2, 3, 4 and 6 were challenged, and spleens obtained for overlay and mRNA analyses, at ∼6 weeks after vaccination, and mice vaccinated in experiments 1, 5 and 7 were analyzed and challenged ∼12 weeks after vaccination. Exps 4 and 5 were vaccinated at the same time, and Exps 6 and 7 vaccinated at the same time. (XLS) [file ppat.1002494.s006.xls]

## Sheet: Sheet1
Table S2: Relative gene expression in splenocytes derived from differentially vaccinated mice
								Experiment number#
		1	2a%	2b	3	4				5				6				7
Vaccine group:		LVS	LVS		LVS	LVS	LVS-G	LVS-R	HK-LVS	LVS	LVS-G	LVS-R	HK-LVS	LVS	LVS-G	LVS-R	HK-LVS	LVS	LVS-G	LVS-R	HK-LVS
Survival / total:*		N.A.	N.A.	N.A.	N.A.	5/5	5/5	2/5	0/5	5/5	5/5	2/5	1/5	5/5	5/5	3/5	0/5	5/5	4/5	3/5	0/5
Gene	Detection‡
Bcl6	Profiler	1.32~	1.31951	1.27456	1.43396	1.09885	1.10038	1.24833	1.12975	1.67714	1.75808	1.36794	1.11265	0.857376	1.01115	1.03383	1.15669
Ccl11	Profiler
Ccl5	Profiler	1.27456	1.59107	1.89212	0.795536	0.844401	0.741234	0.655197	0.719966	1.58667	1.08975	1.24143	0.467812	1.19582	1.16151	1.03383	0.806642
Ccl7	Profiler	1.13288	1.52626	1.81504	0.742262	1.83528	1.87644	0.823591	0.399426	2.76255	1.75808	1.22434	0.661586	1.59992	1.1065	1.25527	0.823591
Ccl7	qRT-PCR					2.62	1.41	0.5	0.57	2.27	1.85	0.51	0.72	2.47	1.57	0.65	0.32	1.9	0.25	0.63	2.01
Ccr10	Profiler					0.635516		1.08673	0.43407		0.195332	0.587231		1.67946	1.06881	0.82245	0.469761
Ccr2	Profiler	3.09513	0.90125	0.858565	0.528509	0.495171	0.516915	0.747425	1.42998	0.311219	0.51907	0.853818	0.765248	0.56175	0.37527	0.668037	1.20581
Ccr2	qRT-PCR					0.34	0.43	0.24	1.58	0.34	0.45	1	1.47	0.31	0.66	0.32	0.64	8.15	2.96	2.84	4.38
Ccr3	Profiler	2.82843	2.69447	1.7411	1.09429	1.58667	1.45196	1	1.31585	0.874179	0.765248	0.83047	0.625898	2.26263	0.924023	1.8	1.84038
Ccr3	qRT-PCR					0.33	0.67	0.2	1.64	0.2	0.2	0.5	0.58	0.3	0.3	0.1	0.41	10.93	0.52	0.79	6.67
Ccr4	Profiler	24.761		0.105112	0.0476956	0.86814	0.58156	1.05702	0.455651	1.48041	1.48865	0.591316	0.471066	0.857376	0.880259	1.43197	1.82766
Ccr5	Profiler	6.02099	2.44528	2.02792	1.54756	1.93992	1.59992	0.876606	0.745355	1.47019	1.26927	1.26751	0.860949	2.96493	1.63127	3.09084	1.6358
Ccr5	qRT-PCR					1.95	2.1	0.38	0.52	1.47	1.28	1.4	1.71	2.03	2.56	1.6	1.2	30.64	5.32	4.62	6.04
CD27	Profiler	2	0.82932	1.41421	1.00696	0.671752	0.794434	0.972655	1.22774	0.862144	0.64797	0.896267	0.68968	0.767373	0.560972	0.618995	1.07177
Cd28	Profiler	3.27161	1.48452	1.33793	0.946058	0.605417	0.59378	0.773782	0.892547	0.710054	0.759962	0.764188	1.26927	0.711039	0.605417	0.778085	1.31039
Cd4	Profiler	3.89062	0.687771	1.37554	1.37554	0.631126	0.573554	0.76313	0.77164	0.690637	0.652477	0.813379	0.471066	1.53475	0.695441	2.01112	2.21914
CD40	Profiler	3.01049	0.712025	0.835088	1.23114	1.47019	1.65634	1.37554	1.09126	1.55401	1.7219	1.28521	0.98214	0.991717	1.21083	1.19582	0.888843
CD40lg	Profiler	3.38698	0.90125	0.939523	1.03526	1.04681	1.02669	1.33793	1.35285	0.782412	0.337744	0.435879	0.968618	0.706127	0.512634	0.65884	1.02101
Cd80	Profiler	4.14106	1.02811	1.31951	0.852635	1.42011	1.13918	0.864537	0.676424	1.02527	0.729005	0.40388	0.216734	0.918913	1.06881	1.23799	1.02811
Cd86	Profiler	1.87905	0.80107	0.972655	0.920188	1.8609	1.8	1.25701	0.936921	1.79751	1.65176	1.31221	0.357001	1.45196	1.77276	2.11111	0.895025
Cebpb	Profiler	4.11246	1.48452	1.8025	1.19748	1.36226	1.21251	0.993092	0.91764	1.16959	1.00975	1.18263	1.04536	1.96973	1.66555	1.83783	1.14076
Crebbp	Profiler	0.441351	1.55833	0.993092	1.06437	3.00216	1.9292	2.75108	3.47256	0.95	0.942131	0.392836	1.40834	1.94261	0.714992	2.61716	2.44528
Csf2	Profiler	11.3924	0.726986	1.84038	2.49666	3.77375	5.68831	0.926588	0.413512	3.54553	2.60991	0.84792	0.21976	0.805524	5.68043	3.38229	0.858565
Csf2	qRT-PCR					10.18	11.54	0.47	0.28	1.58	1.51	0.44	0.32	0.43	3.75	1.18	0.31	6.06	3.85	2.26	1.71
Ctla4	Profiler	1.56917	0.952638	1.26576	0.697372	0.969962	1.04102	0.97942	1.02527	1.18591	1.31403	1.13446	0.723969	0.951318	0.856188	1.10803	1.04972
Cxcr3	Profiler	5.54044	1.39474	2.14355	0.590496	1.51152	1.44193	1.16473	1.8226	1.93992	1.85832	2.55266	1.499	1.71475	1.23628	1.18756	1.07923
Gata3	Profiler	4.34694	0.707107	0.876606	0.574349	0.75576	0.86334	1.13288	1.15349	0.874179	0.849096	0.908778	1.10496	0.86334	0.714992	1.35472	1.61328
Gata3	qRT-PCR					0.66	1.17	0.65	1.17	0.62	0.56	0.65	0.64	0.57	1.24	0.85	1.38	1.75	0.98	1.27	1.75
Gfi1	Profiler	3.91768	2.17347	2.65737	1.07177	1.21083	0.971307	0.858565	0.898755	0.793334	0.792235	0.824734	0.739181	3.96687	1.79751	3.02723	2.25012
Icos	Profiler	3.70635	1.69349	1.51572	1.84038	1.01819	1.14711	1.13288	0.777007	0.618138	0.652477	0.698339	0.568015	1.39281	1.24487	1.78757	1.25701
IFN-g	Profiler	188.706	7.78124	7.46426	12.3805	49.385	59.6314	4.02782	0.333556	16.6333	9.74053	1.07326	0.398873	19.671	98.0877	82.0255	0.702222
IFN-g	qRT-PCR					359	348	5.85	0.3	31.16	20.31	0.79	0.6	12.97	77.69	33.28	0.21	16.23	12.18	5.21	1.2
Igsf6	Profiler	2.53151	3.73213	1.37554	1.46409	1.16959	0.636397	0.768438	0.681129	1.28877	1.28699	1.40639	2.64634	1.61105	0.943438	1.91587	1.64718
IL-10	Profiler	0.63728	2.18859	1.18921	0.550953	1.35285	1.04102	0.712025	0.730016	1.31585	0.87904	1.49692	1.05995	0.736113	1.29774	1.28165	0.823591
IL-12b	Profiler	1.02101	0.707107	1.6245		0.821311	0.805524	0.858565	1.24487	0.618138	0.583984	0.34917	0.548666	0.794434	0.45882	0.875391	1.58008
IL-12b	qRT-PCR					0.47	0.56	0.23	0.83	0.71	0.32	0.43	0.65	0.32	0.47	0.28	0.47	0.79	0.28	0.45	0.93
IL-12rb2	Profiler	6.06287	2.01391	2.88786	0.673617	7.09105	3.72696	1.53688	0.832776	6.84951	2.97729	1.76786	1.83274	13.5292	3.3776	12.1089	3.18215
IL-12rb2	qRT-PCR					3.73	5.06	0.72	0.54	1.63	1.24	0.82	0.81	1.84	2.5	1.78	0.52	3.71	1.42	1.37	1.09
IL-13	Profiler	0.277392	2.56685	1	6.02099	0.564874	1.32685	0.806642	0.158879	4.30496	4.03901	7.02257	8.59799	0.193178	2.72452	2.96493	0.737135
IL-13	qRT-PCR					0.76	0.94	0.05	0.08	0.86	0.67	0.82	0.76	0.34	6.27	0.81	0.82	2.78	0.63	0.8	3.21
IL-13ra1	Profiler	0.532185	1.91853	1.86607	2.90795	1.71238	1.37364	1.18921	0.969962	2.29104	2.40161	1.75564	1.428	3.15579	0.983502	2.20076	2.01391
IL-15	Profiler	5.24157	0.952638	0.757858	2.18859	1.07624	1.03383	0.806642	0.681129	0.943438	0.910039	0.836246	0.803294	1.0629	1.00417	1.48247	1.18921
IL-17a	Profiler			0.539614	2.18859	4.07274	3.67565	0.517632	0.0931694	4.64603	2.66475	1.09581	0.26134	1.30858	11.3609	10.4686	1.15669
IL-17a	qRT-PCR					11.24	14.46	0.95	0.17	6.11	3.98	1.51	1.02	0.85	13.71	9.03	0.66	0.47	0.15	0.29	0.61
IL-18	Profiler	1.85318	0.790041	0.493116	2.44528	0.777007	0.893785	0.80107	0.963262	1.26225	1.38896	1.40639	0.975355	0.918913	1.06881	1.1235	1.40444
IL-18bp	Profiler	4.95883	1.71713	2.56685	1.20581	5.79979	4.62034	2.28153	1.50108	3.28524	2.81669	1.25006	0.775931	7.61055	3.26255	5.19816	2.05623
IL-18bp	qRT-PCR					7.39	6.49	1.28	1.69	3.1	2.38	1.06	0.89	3.56	2.73	1.68	0.44	3.27	0.68	1.46	1.07
IL-18r1	Profiler		0.668964	0.532185	0.678302	0.777007	0.736113	0.80107	0.618138	2.18253	1.00975	1.33053	1.79502	4.31093	0.905006	0.17776	4.19887
IL-2	Profiler	3.97237	0.721965	1.77769	2.54912	1.24487	3.00632	0.939523	0.798852	0.844401	1.05263	1.21588	0.302289	0.247929	0.844401	0.527777	0.650671
IL-22	qRT-PCR					14.49	12.89	0.36	0.03	3.33	3.41	0.9	0.61	0.38	5.02	2.65	0.17	2	1.11	1.52	1.16
IL-23a	Profiler													3.77899	3.49671	7.00313	5.06303
IL-23a	qRT-PCR					2.62	3.66	0.11	0.35	0.74	0.69	1.1	1.49	0.29	1.34	0.93	0.36	20.04	2.77	2.42	3.82
IL-27	Profiler		1.14076	6.77396	0.737135					1.54328	1.56266	1.12662	0.961927	3.04829	3.54553	3.88523	1.26576
IL-27	qRT-PCR					6.58	7.78	0.61	0.75	2.21	2.08	1.04	1.56	2.69	5.12	2.42	0.46	6.13	0.68	0.93	1.75
IL27ra	Profiler	2.2974	1.40444	1.37554	0.952638	0.724973	0.845572	0.895025	1.01819	0.644387	0.652477	0.656106	0.467812	0.984866	0.695441	1.55617	1.82766
IL-27ra	qRT-PCR					0.89	1.43	0.83	1.13	0.47	0.39	0.68	0.53	0.37	0.57	0.47	0.41	1.24	0.74	1.05	0.79
IL-2ra	Profiler	3.03143	1.30134	1.07923	1.82766	1.26225	1.21251	0.80107	0.53812	1.4103	1.05263	1.14235	0.501388	0.527777	1.06881	1.53475	0.80107
IL-4	Profiler	1.65864								0.280486	0.407254	3.27615	0.182251	1.15509	1.74836	3.45336	1.36604
IL-4ra	Profiler	2.46229	0.993092	1.31951	1.00696	1.00417	1.34537	1.39474	1.29774	0.983502	0.910039	0.717972	1.09733	1.46206	1.06142	2.29421	2.26577
IL-5	Profiler					0.252788	0.168171	0.590496	0.119576		2.24078	21.2885	2.1795	0.731029	1.51152	2.37512	2.88786
IL-6	Profiler	6.82108	1.72907	3.01049	2.58471	4.39542	3.24451	0.742262	0.252788	7.6	3.87447	0.883928	0.592136	4.62034	4.64603	5.53276	1.07177
IL-6	qRT-PCR					9.22	7.17	0.5	0.42	8.44	5.27	0.8	1.2	2.53	3.03	2.43	0.41	5.18	0.83	0.71	0.67
IL-7	Profiler					0.468461	0.682074	1.06437	0.37788	2.16745	0.0455628	0.94737	1.18427	1.81252	0.880259	1.22944	1.05702
IL-9	Profiler													0.0812212	0.936921	1.4025	0.386891
IL-r1	Profiler		14.6213	8.87656	1.59107	0.613868	0.492433	0.768438	0.512634	1.21926	0.744323	1.02954	0.442577	1.78757	0.631126	1.35472	1.46409
Inha	Profiler					0.214047			0.172659	1.46003	9.2792	23.621	0.723969	63.0315	19.918	20.0844	47.1766
Irf1	Profiler	1.75321	1.00696	1.12506	1.18099	2.50707	3.24451	2.63902	0.644387	2.32302	2.9363	1.50733	0.744323	2.06766	2.33918	2.94445	1.51572
Irf1	qRT-PCR					3.52	4.63	2.92	0.54	2.48	2.39	1.15	0.56	1.46	2.14	1.22	0.49	1.99	1.3	1.83	1.43
Irf4	Profiler	3.5801	1.60214	1.07177	1.04972	2.16745	1.9292	1.93187	2.40494	0.592957	0.803294	0.647073	1.19251	3.60001	0.95	3.47738	3.13834
Jak1	Profiler	2.20381	0.946058	1.32869	1.49485	0.735094	0.816769	1.06437	1.31585	0.91764	0.68968	1.02243	0.837406	0.636397	0.644387	0.79996	0.888843
Jak2	Profiler	1.75321	1.15669	1.10191	0.858565	1.21926	1.08523	1.07923	0.956608	1.29774	1.14393	1.20748	0.843231	0.925304	0.838568	2.11111	2.02792
Jak3	Profiler	6.82108	0.668964	0.566442	1.94531	3.26255	2.84415	2.92817	2.45547	0.530712	0.675487	0.332632	0.855002	7.82451	2.32302	13.2507	8.87656
Junb	Profiler	2.18859	1.09429	1.03526	1.25701	1.83528	1.77522	1.65864	1.4103	1.05409	1.03097	0.902501	0.929161	1.59992	1.05409	2.18556	1.72907
Maf	Profiler	1.30134	0.946058	1.3566	1.09429	0.815637	0.715984	0.823591	0.787854	0.597082	0.501388	0.567228	0.739181	0.833931	0.502084	1.10803	1.42405
Mapk8	Profiler		0.870551	1.14076		2.55974	1.96973	3.36359	2.03637	1.22774	2.00555	1.74352	1.67481	0.318199	0.584794	0.425727	0.397768
Mapk9	Profiler	4.22807	1.10191	1.04972	1.39474	1.28877	1.44193	1.27456	1.24487	1.16959	1.26927	0.802181	0.935623	1.35472	1.09126	1.50316	1.30134
Nfatc1	Profiler	0.668964	0.823591	1.19748	1.26576	0.963262	0.93174	1.17283	1.21926	0.886382	0.723969	0.579146	0.885154	2.15547	0.838568	2.35871	2.32947
Nfatc2	Profiler	0.697372	0.432269	0.524858	4.99332	7.14038	6.81163	8.69388	11.1271	0.681129	0.68968	0.379455	1.46815	7.66348	1.57571	8.80303	12.3805
Nfatc2ip	Profiler	0.726986	0.920188	2.26577	1.12506	3.96137	4.71743	3.68075	4.58207	0.86814	0.831622	0.551717	1.2008	0.900002	0.648869	1.11574	1.07177
Nfatc3	Profiler	2.65737	1.45397	1.31039	1.14076	0.815637	0.805524	1.04972	1.15349	0.911301	0.975355	1.20748	0.825878	0.828171	0.735094	0.845572	0.852635
Nfkb1	Profiler	3.94493	0.965936	1.23971	0.888843	0.91764	0.991717	1.13288	1.17772	1.09885	1.19251	1.13446	0.837406	1.22095	0.997231	1.51362	1.29235
Pcgf2	Profiler	1.04972	2.82843	3.09513	0.90125	1.37173	1.04102	0.939523	0.635516	1.16959	0.718968	0.268315	0.421616	12.978	5.48693	11.5354	12.4666
Ptprc	Profiler	2.60268	1.01396	1.72907	1.19748	1.42011	1.56699	1.05702	1.12194	0.956608	1.04536	1.07326	0.922742	1.87644	1.16151	1.82513	1.69349
Sftpd	Profiler
Socs1	Profiler	1.48452	1.05702	1.01396	1.41421	6.48003	7.61055	4.69134	0.862144	2.94037	3.61501	0.807761	0.825878	6.81163	6.39082	8.56231	2.46229
Socs1	qRT-PCR					14.6	17.25	5.27	1.28	4.7	5.08	1.05	0.84	2.72	8.91	4.48	1.07	3.49	2.62	2.81	1.61
Socs3	Profiler	3.86375	1.04247	1.98618	1.21419	1.53262	1.71475	1.26576	0.798852	0.997231	0.948684	0.769504	0.694478	3.24451	2.74347	3.83174	1.81504
Socs5	Profiler		1.93187	1.39474	1.38511	1.04681	1.22095	1.41421	1.4103	1.06142	1.09733	1.15029	0.916369	1.34537	0.714992	1.17936	1.76541
Spp1	Profiler	0.63728	0.493116		0.426317	0.609628	0.696406	0.757858	0.735094	1.04681	0.704172	1.00139	0.588046	1.76296	0.892547	1.11574	1.7411
Stat1	Profiler	2.96905	0.823591	0.82932	0.846745	1.52203	1.82513	1.93187	0.740207	2.16745	1.95071	1.38703	0.675487	2.11111	1.5977	2.51054	1.42405
Stat1	qRT-PCR					2.34	3.73	2.26	0.86	1.7	1.16	0.73	0.45	0.92	1.45	1.39	0.54	1.11	0.75	1.34	1.38
Stat4	Profiler			0.768438						1.03958	1.21757	4.47535		1.39281	1.01115	3.26708	1.97247
Tbet	Profiler	7.67411	2.2974	4.34694	1.18099	8.79083	6.67145	3.38698	1.95342	3.52104	5.21982	1.56049	1.45801	4.28115	3.3776	3.88523	0.882703
Tbet	qRT-PCR					3.73	5.22	0.93	1.17	2.27	1.89	2.12	2.04	1.72	3.74	0.92	0.38	9.5	2.27	3.37	0.86
Tcfcp2	Profiler		0.732043	1.10191	0.972655	0.862144	0.828171	1.3566	1.02527	0.545632	0.652477	0.629379	0.541112	1.99723	0.653383	1.63354	1.84038
Tgfb3	Profiler	1.50525	1.18921	1.00696	1.56917	1.42998	1.73869	1.90528	2.0223	1.09885	1.43794	1.0367	1.74594	2.4932	0.997231	2.51054	2.82843
Tlr4	Profiler		0.528509	1.58008	1.08673	1.17772	1.27279	1.42405	1.08373	1.06142	1.14393	1.49692	1.59549	2.69073	0.898755	2.27837	2
Tlr6	Profiler	1.71713	0.68302	1.44393	1.86607	1.84805	1.77522	1.28343	0.798852	1.6888	1.2605	1.05848	1.46815	4.55673	1.23628	3.50157	2.09943
Tmed1	Profiler	4.72397	1.31039	1.42405	1.52626	1.64262	1.69114	1.33793	1.15349	0.963262	0.988971	0.555554	1.01677	1.77522	1.33422	1.18756	1.24833
TNF-a	Profiler	2.65737	1.53688	2.18859	1.39474	2.40494	2.01112	1.02101	0.560972	1.8609	2.0195	1.00835	1.34164	4.85005	2.92006	3.50157	2.32947
TNF-a	qRT-PCR					3.44	4.2	0.73	0.84	1.41	1.28	0.92	1.09	1.76	1.38	1.75	0.82	3.31	0.84	0.84	1.13
Tnfrsf4	Profiler	1.61328	0.817902	1.21419	1.76541	0.838568	1.05555	0.823591	0.730016	1.09885	0.843231	0.987601	0.617281	0.925304	1.27103	0.964598	0.946058
Tnfrsf8	Profiler		0.697372	0.907519	1.32869	0.782412	1.07773	0.737135	0.428094	0.850274	0.860949	0.987601	0.229092	2.02511	1.32501	3.38229	1.89212
Tnfsf4	Profiler	2.15846	1.24833	6.72717	1.23971	1.76052	1.0196	1.05702	0.976709	1.54328	1.15189	0.738157	0.70907	2.02511	0.75576	1.29056	1.15669
Tyk2	Profiler	0.752623	1.16473	1.29235	1.21419	0.685867	0.93174	1.09429	0.911301	0.86814	1.09733	1.08073	1.01677	1.11574	0.862144	1.22944	1.33793
Yy1	Profiler	1.18921	1.17283	1.33793	1.39474	0.662504	0.833931	0.768438	1.17772	1.21926	1.00975	1.45599	1.03097	0.783497	0.976709	0.811127	0.840896
* In each experiment, 5 mice per vaccine group as well as 5 naive mice were challenged with 5 x 105 - 106 CFU LVS IP (determined by retrospective plate count), and survival monitored for a month; all naive mice died within 6 days of challenge, and the numbers of surviving mice within each vaccine group are shown.
‡ Gene expression was evaluated by RT PCR using TH1-TH2-TH3 panel ("Profiler"); selected genes were further evaluated using specific primer/probe sets ("qRT-PCR").
~ All values are calculated fold differences of gene expression between vaccinated and non-vaccinated (naive) splenocytes.
% In experiment 2, the same mRNA preparation was subjected to two independent PCR reactions (2a and 2b).
# Mice vaccinated in experiments 2, 3, 4 and 6 were challenged, and spleens obtained for overlay and mRNA analyses, at ~ 6 weeks after vaccination, and mice vaccinated in experiments 1, 5 and 7 were analyzed and challenged ~ 12 weeks after vaccination. Exps 4 and 5 were vaccinated at the same time, and Exps 6 and 7 vaccinated at the same time.
